# Supplementary material
Source: PubMed Central journal article supplement (PMC5524541)
Supplement: NIHMS814501-supplement-2.pdf [file NIHMS814501-supplement-2.pdf]

Supplementary Figure 1a. Allele frequencies of index SNPs observed in subjects of European and African ancestry.

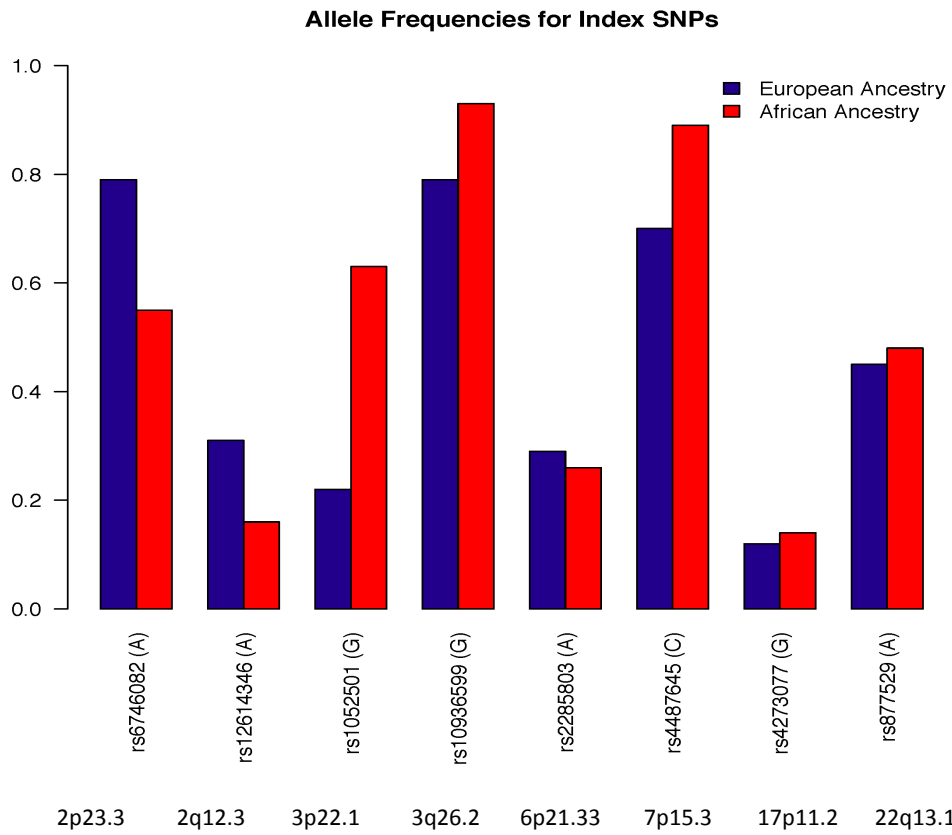

Supplementary Figure 1b. Allele frequencies observed in subjects of European and African ancestry for the most significant SNPs from the combined meta-analysis in two populations.

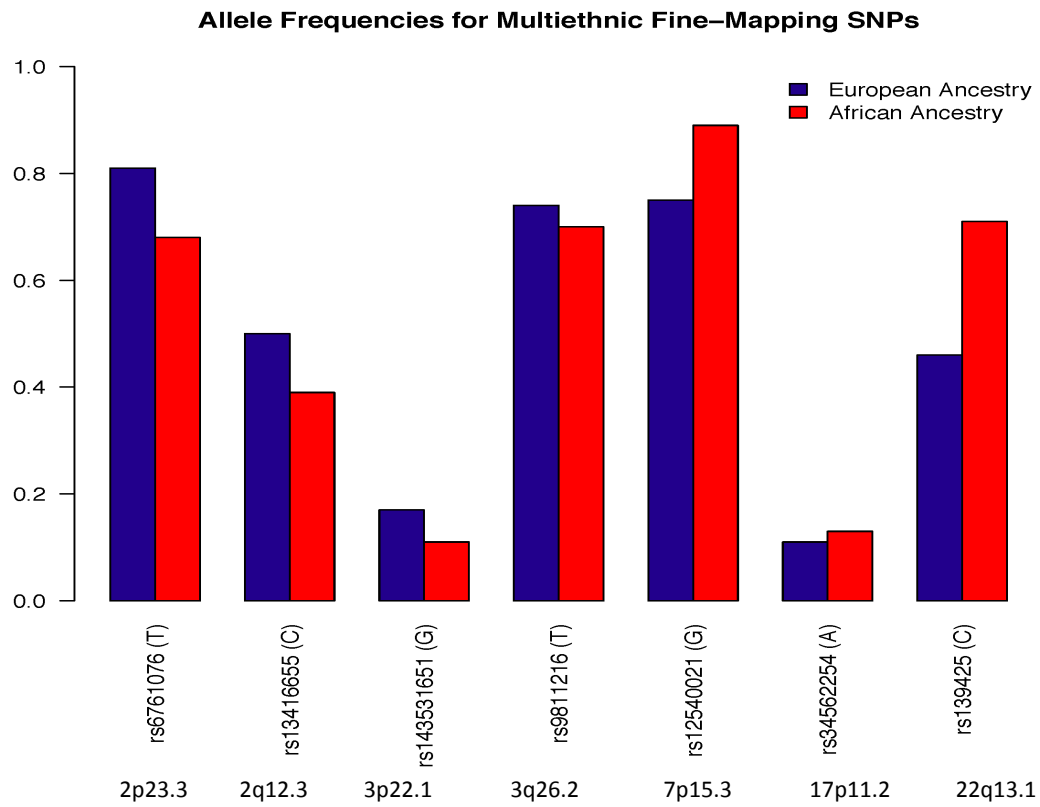

**Supplementary Figure 2a. LocusZoom plots for the eight regions for subjects of European ancestry. (1KGP EUR reference)**

2p23.3

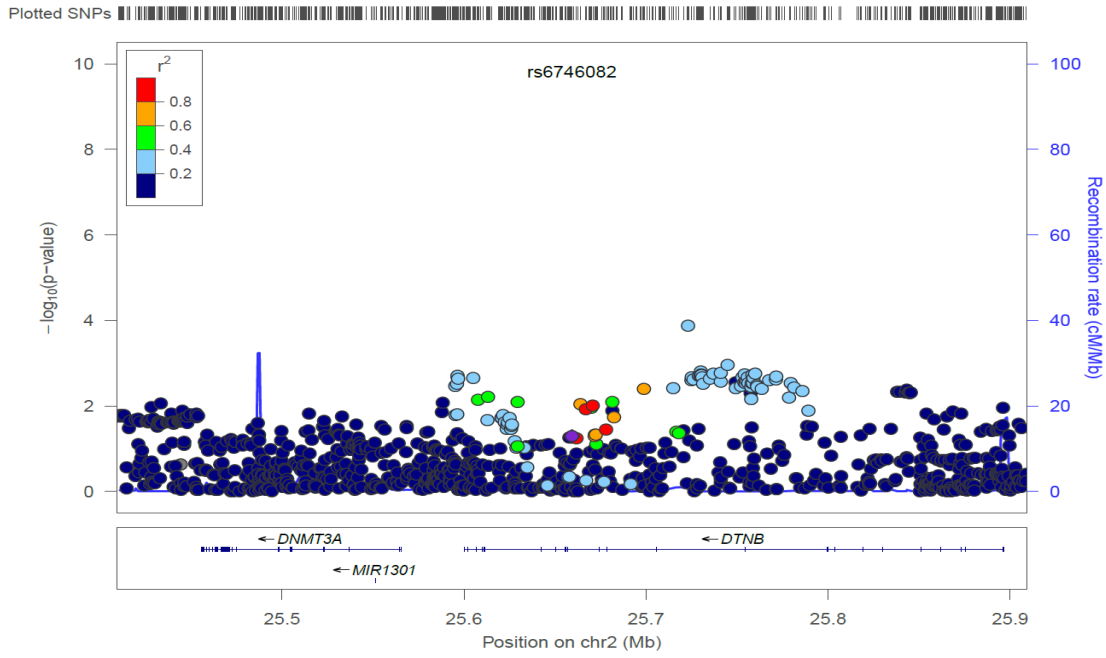

2q12.3

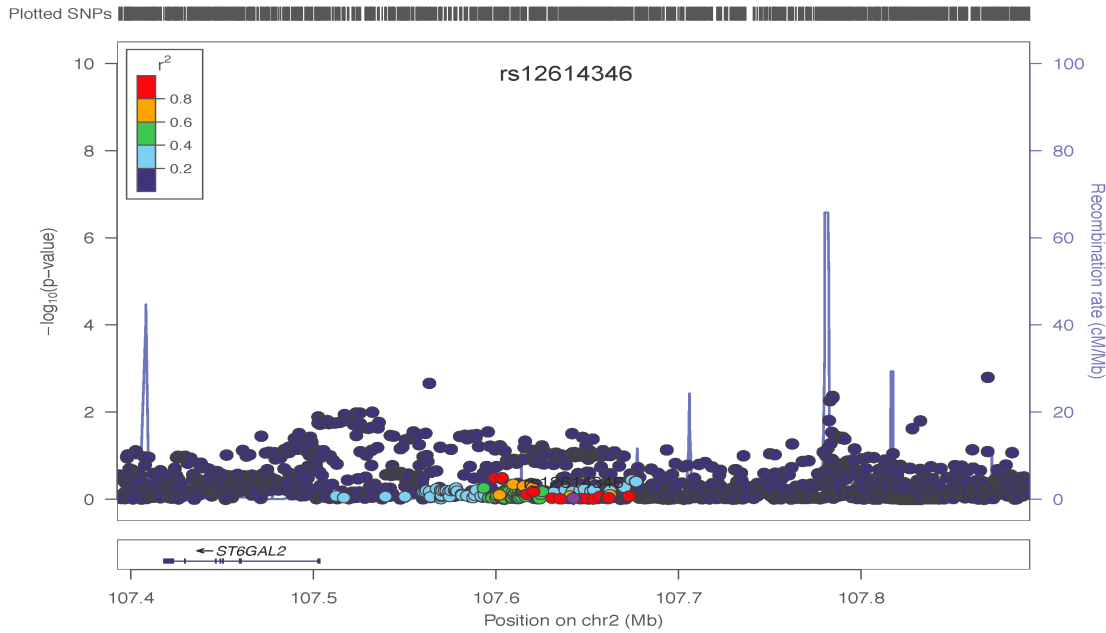

### 3p22.1

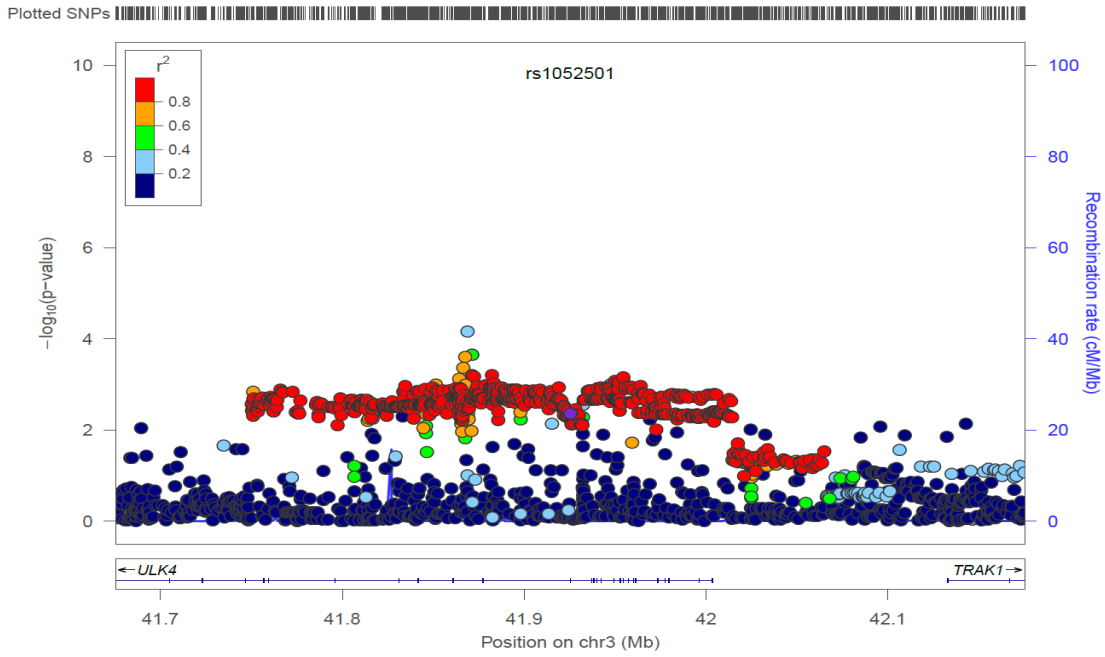

### 3q26.2

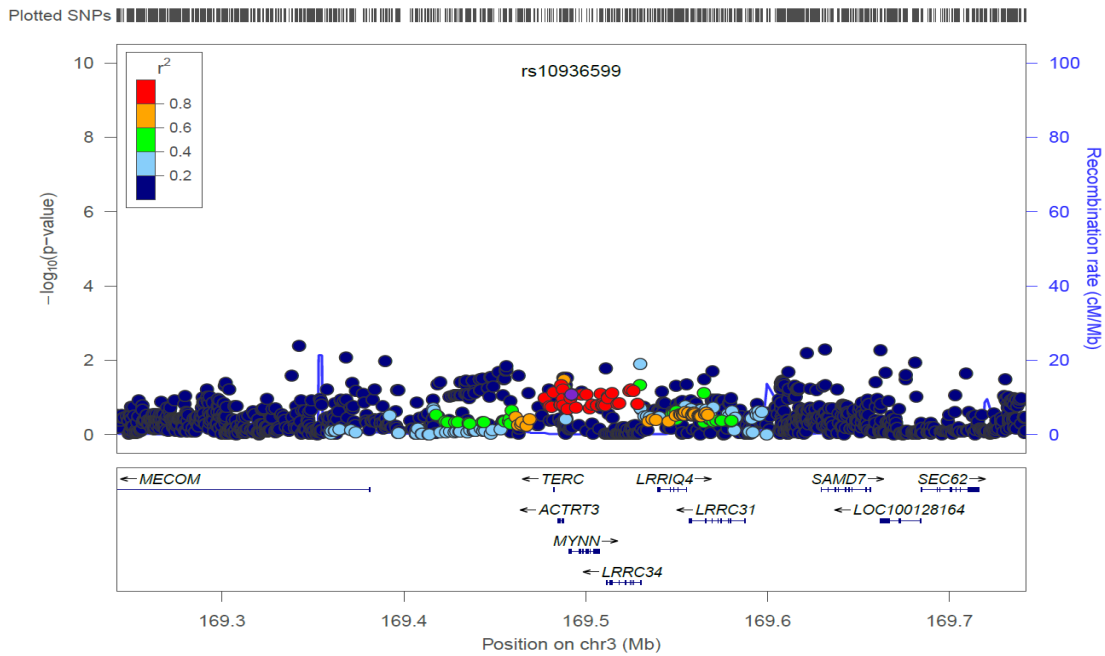

### 6p21.33

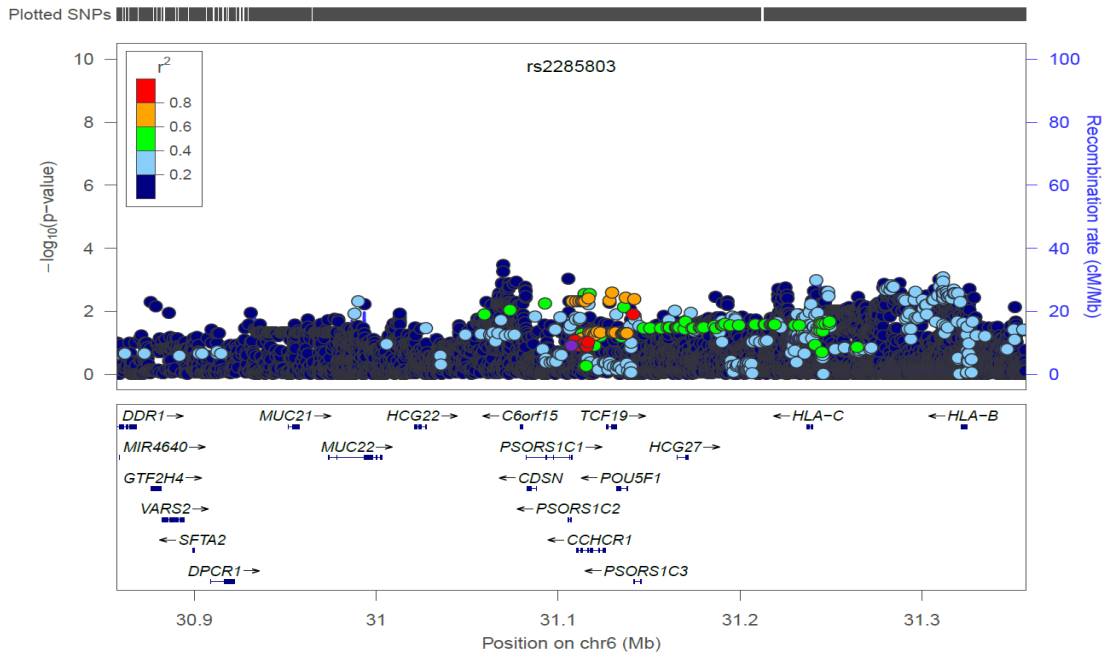

### 7p15.3

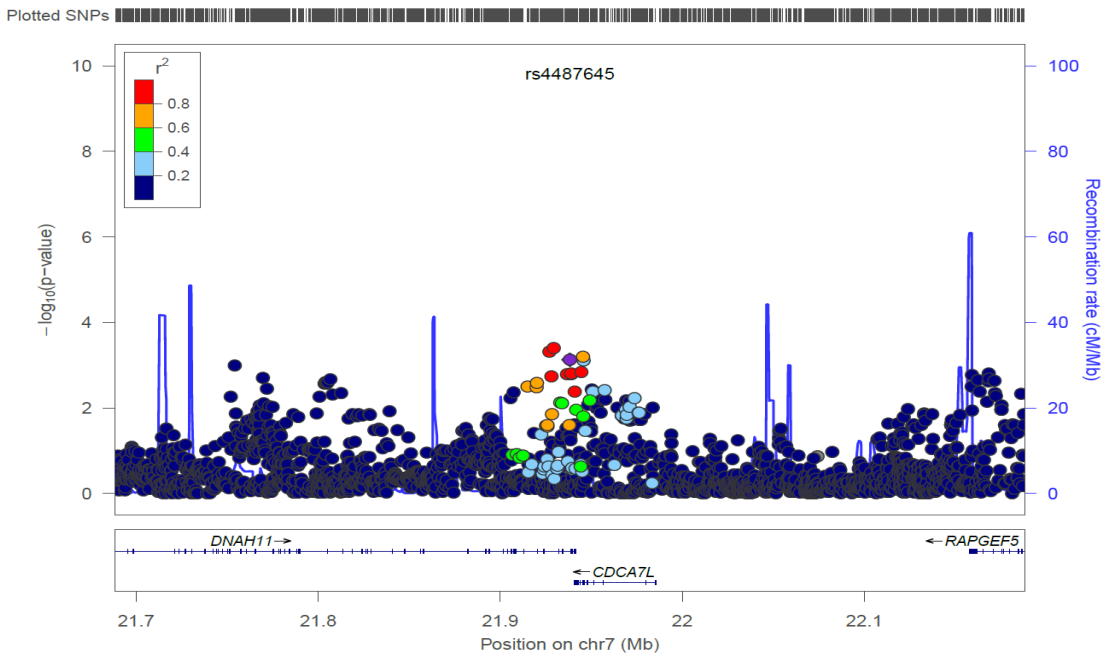

17p11.2

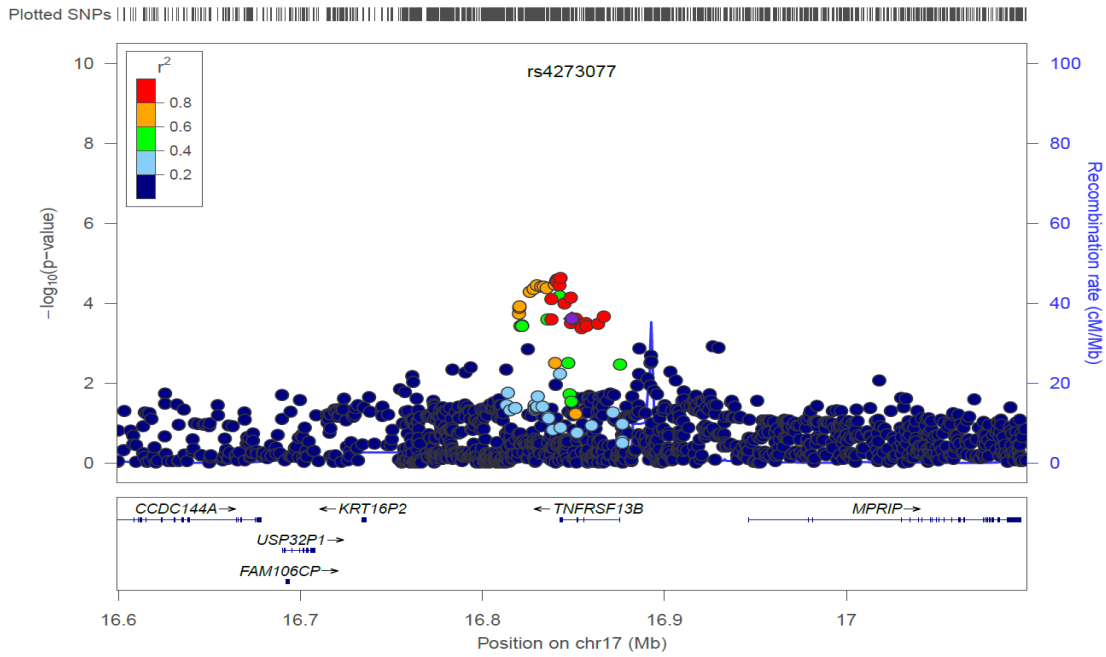

22q13.1

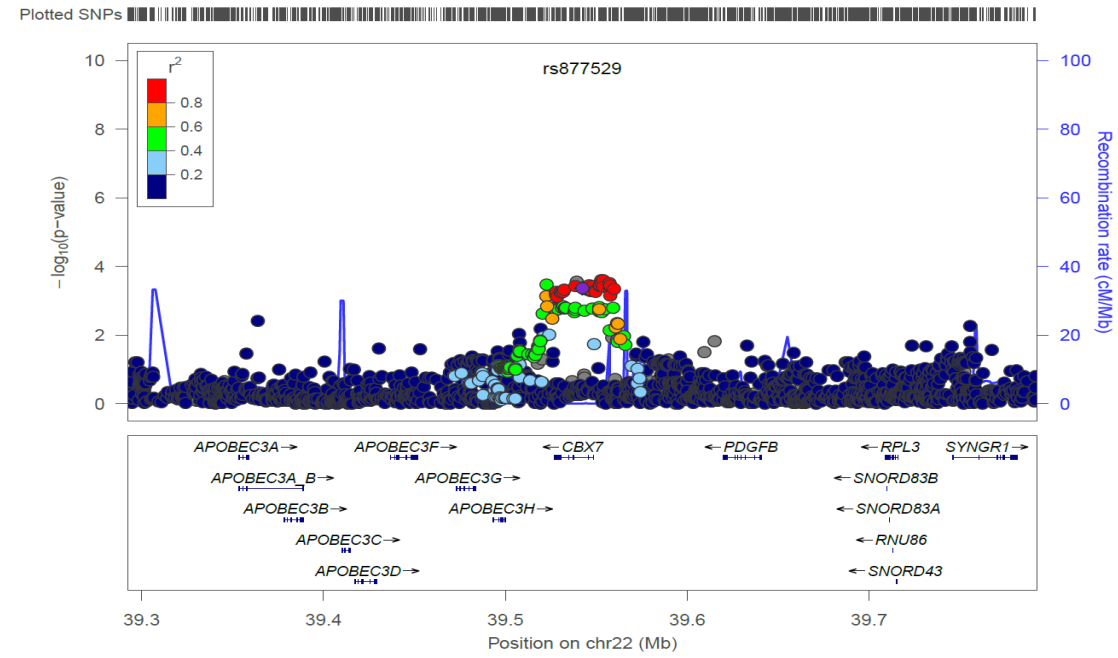

**Supplementary Figure 2b. LocusZoom plots for the eight regions for subjects of African ancestry. (1KGP EUR reference)**

2p23.3

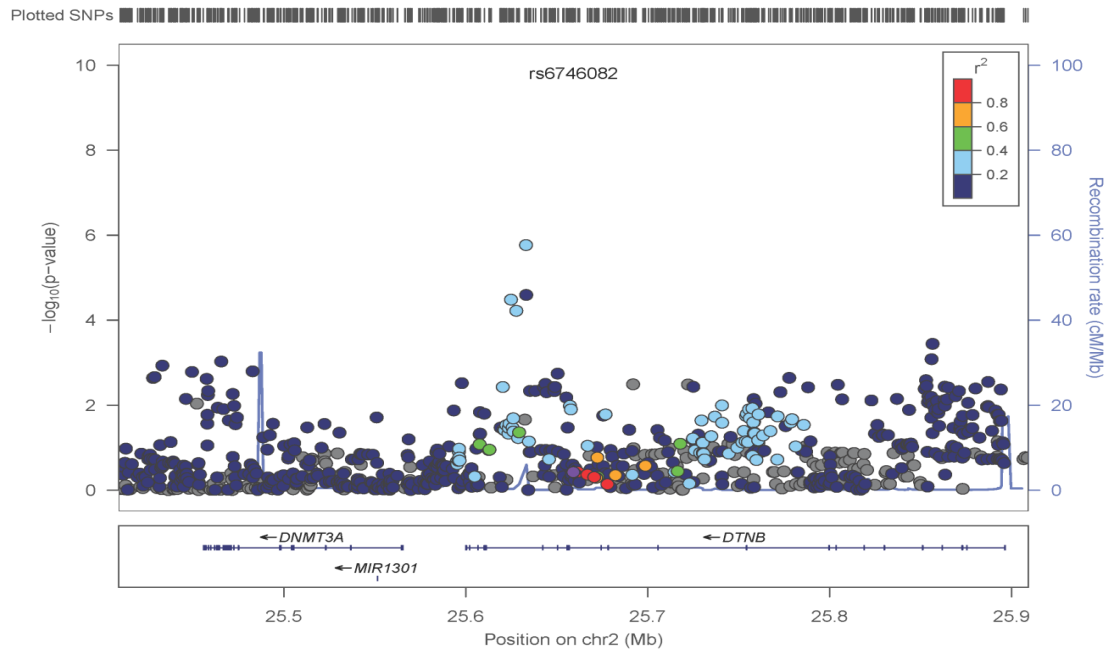

2q12.3

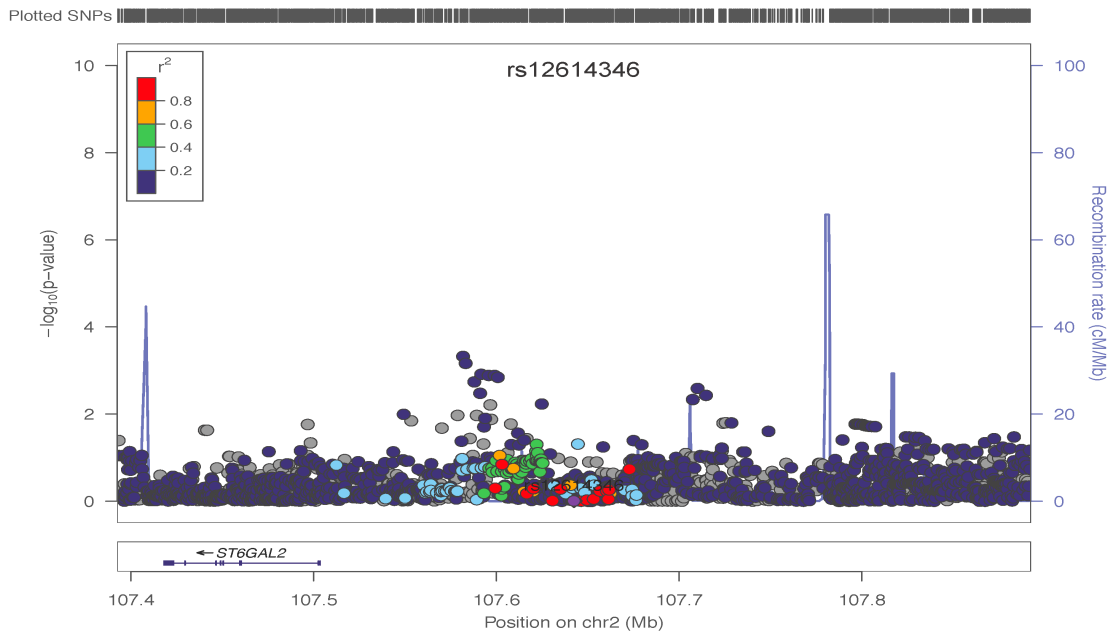

### 3p22.1

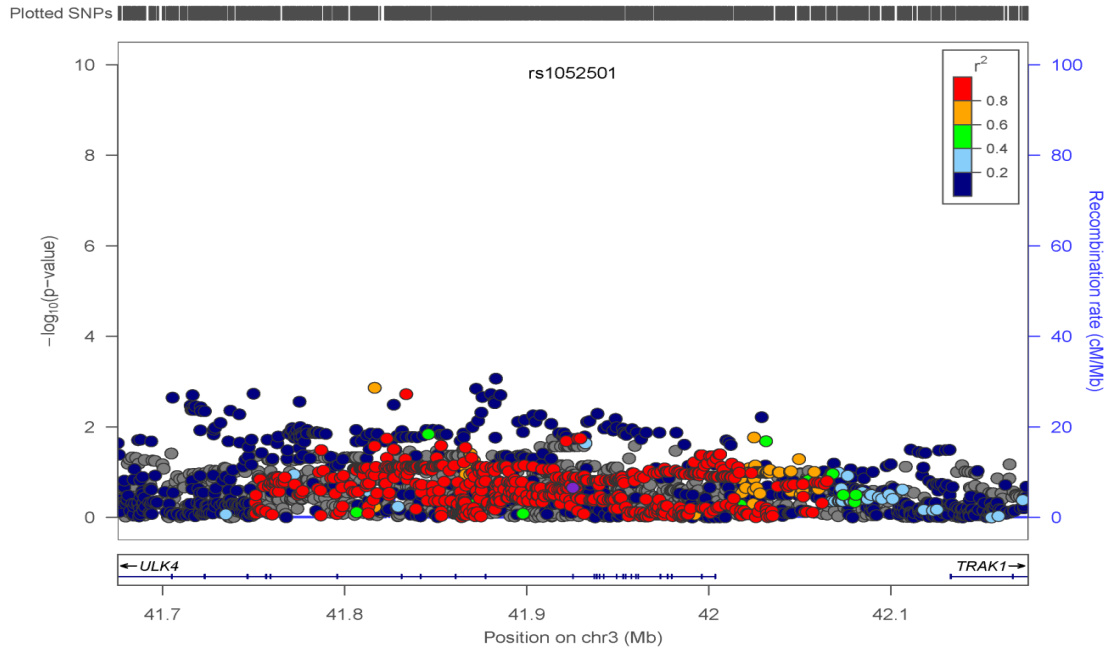

### 3q26.2

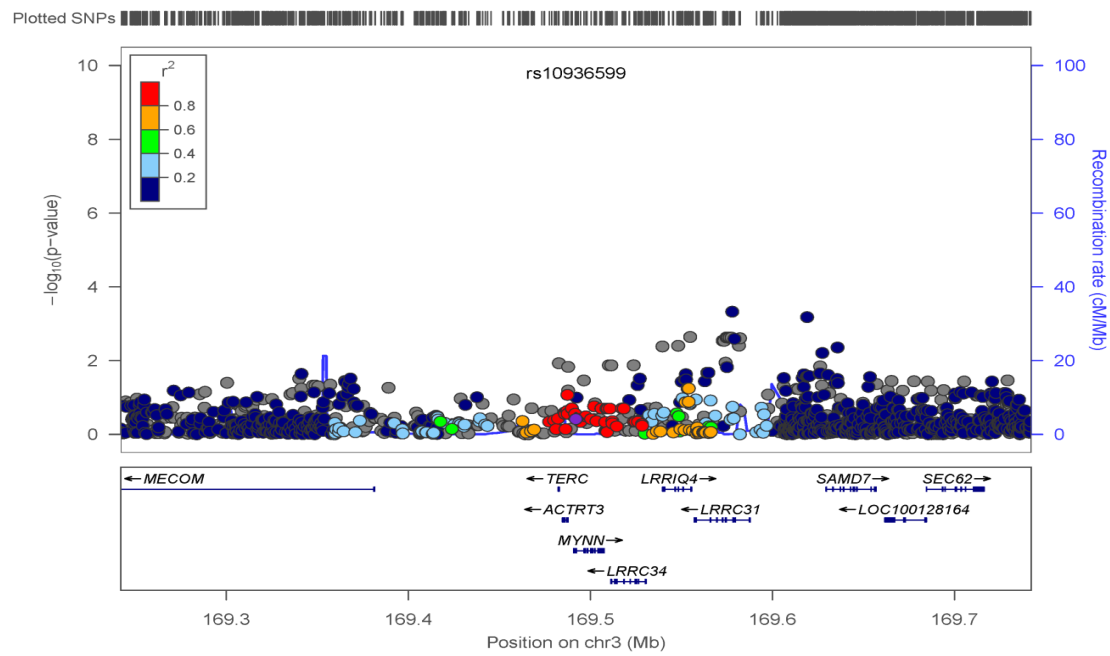



### 6p21.33

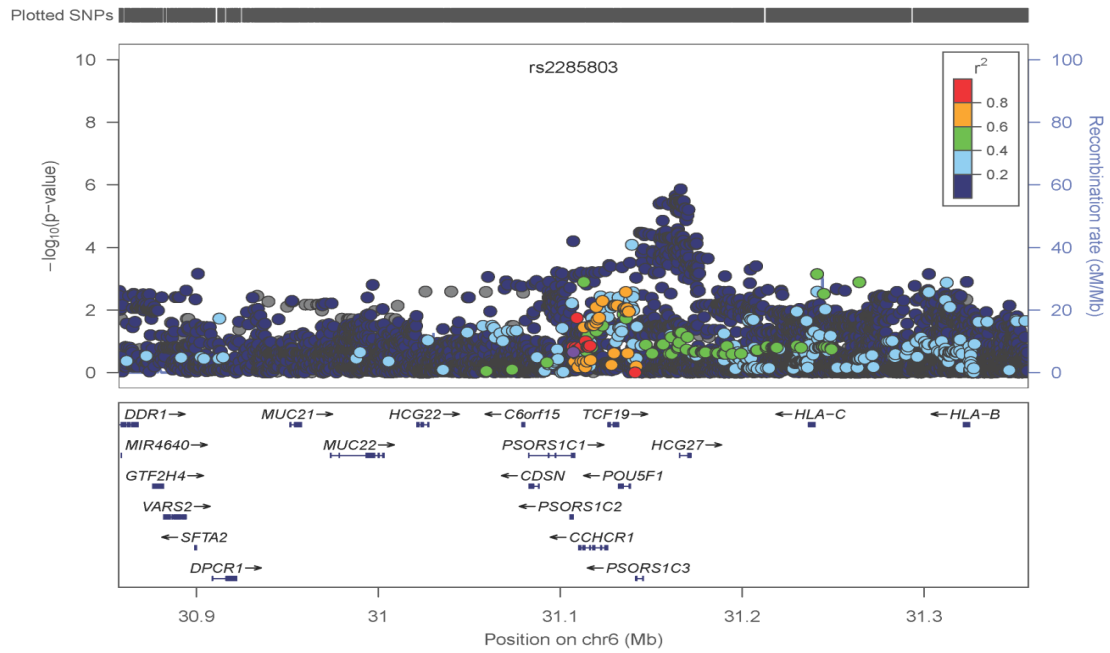

### 7p15.3

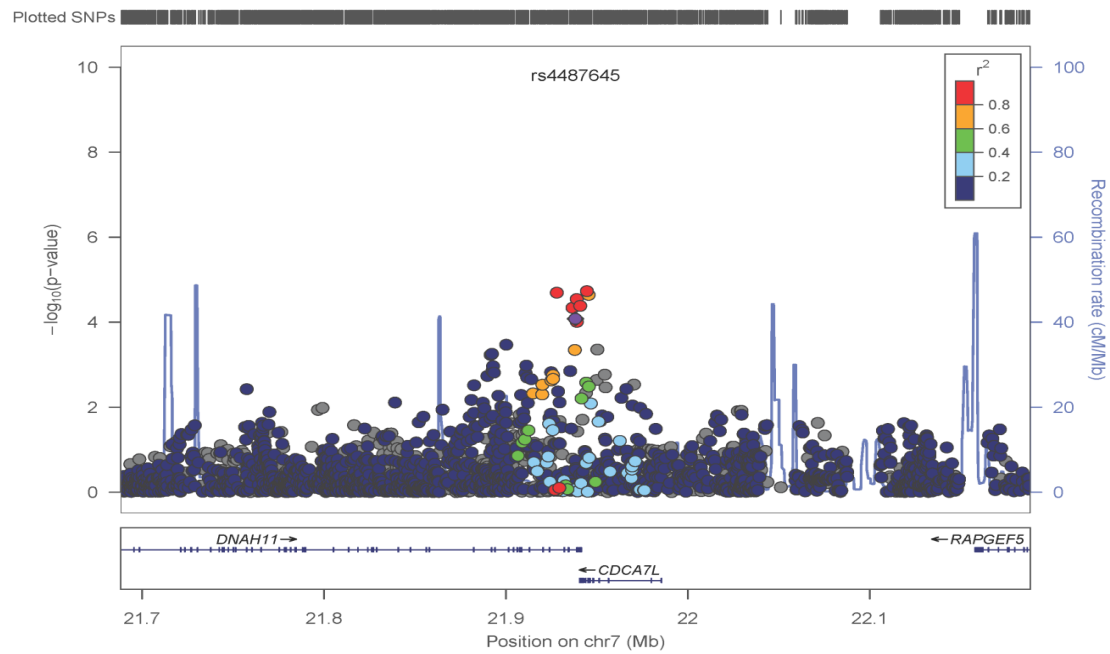

### 17p11.2

Plotted SNPs

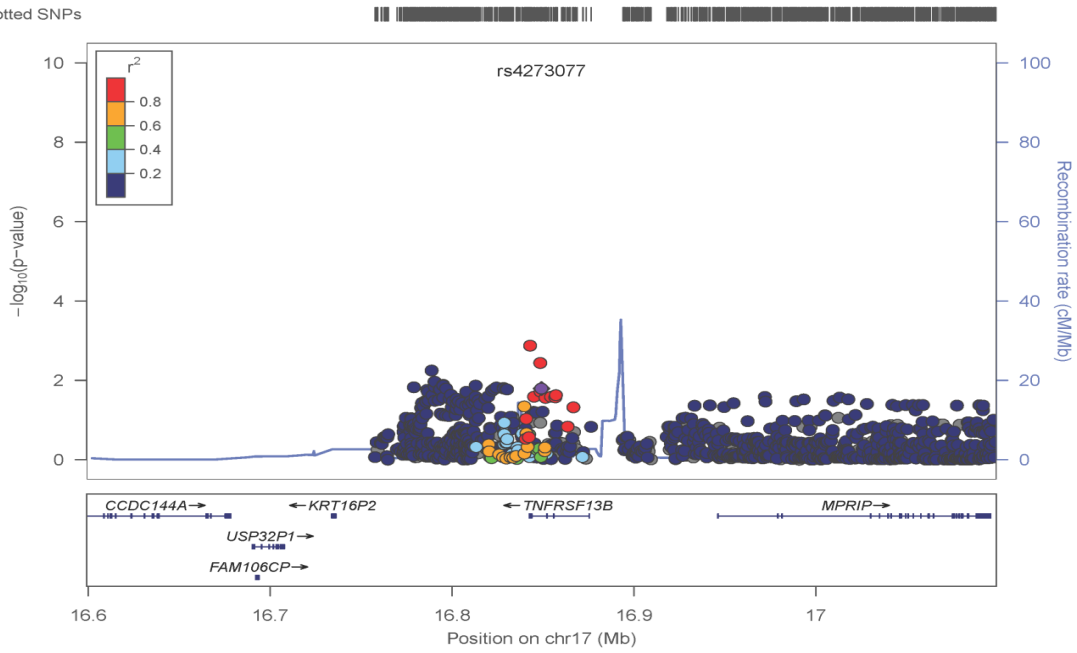

### 22q13.1

Plotted SNPs

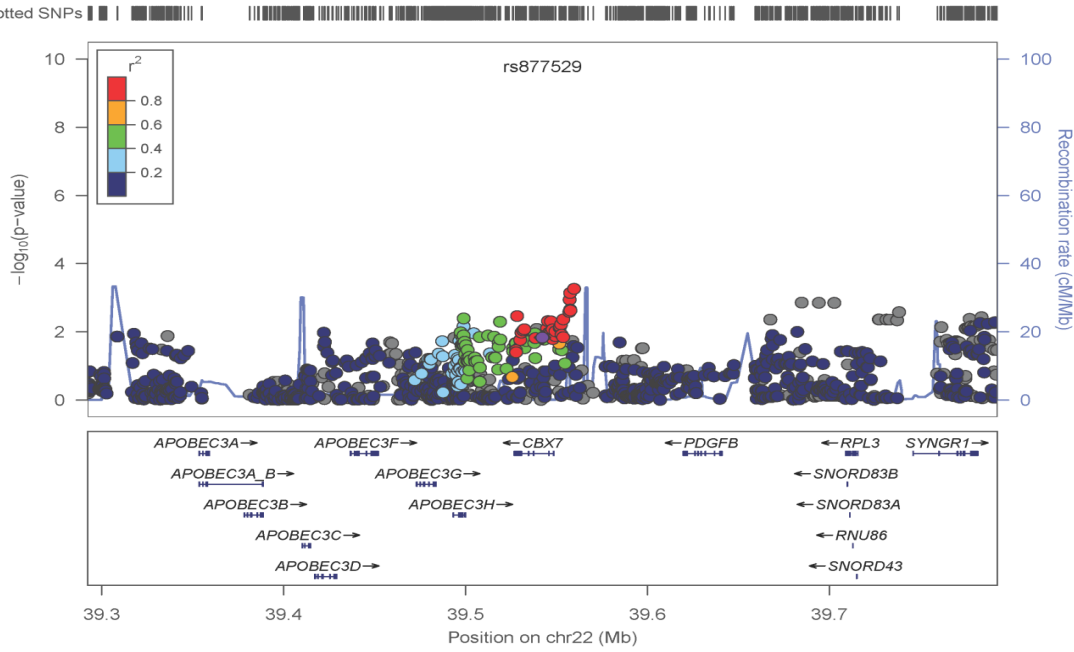

**Supplementary Figure 3a. LocusZoom Plots of European and African ancestry combined meta-analysis with LD calculated in relation to the index SNP (1KGP EUR ref). The most significant Group A SNP in each region is labeled.**

**2p23.3**

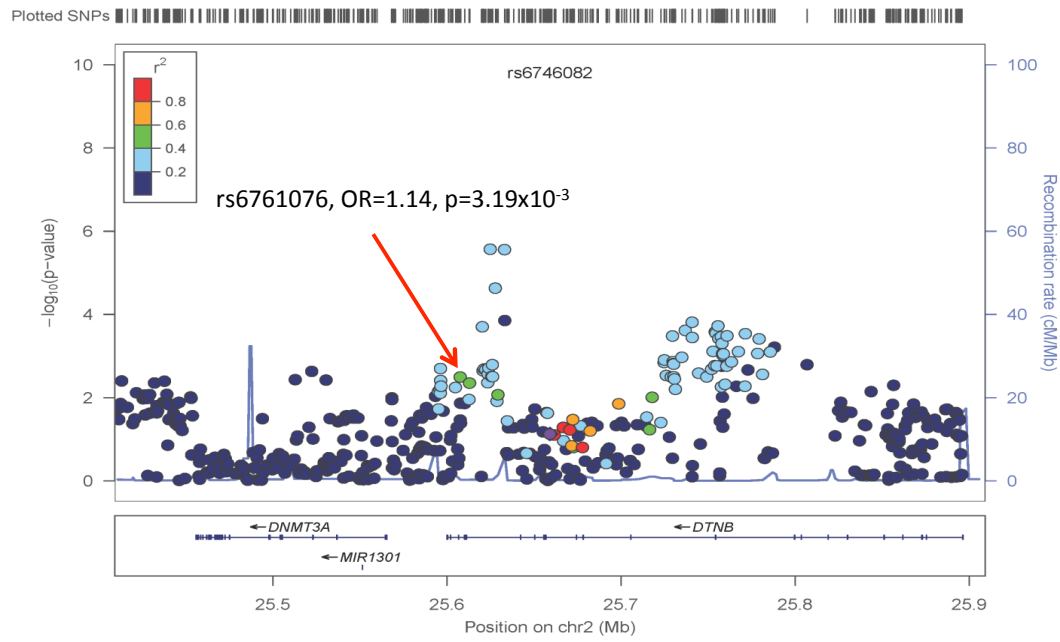

**2q12.3**

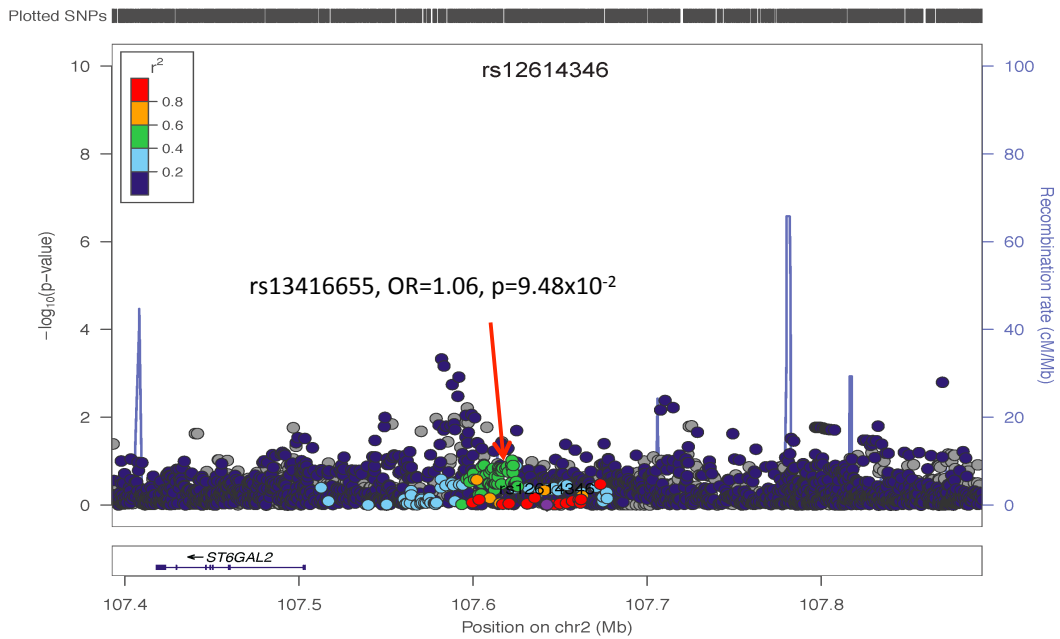

### 3p22.1

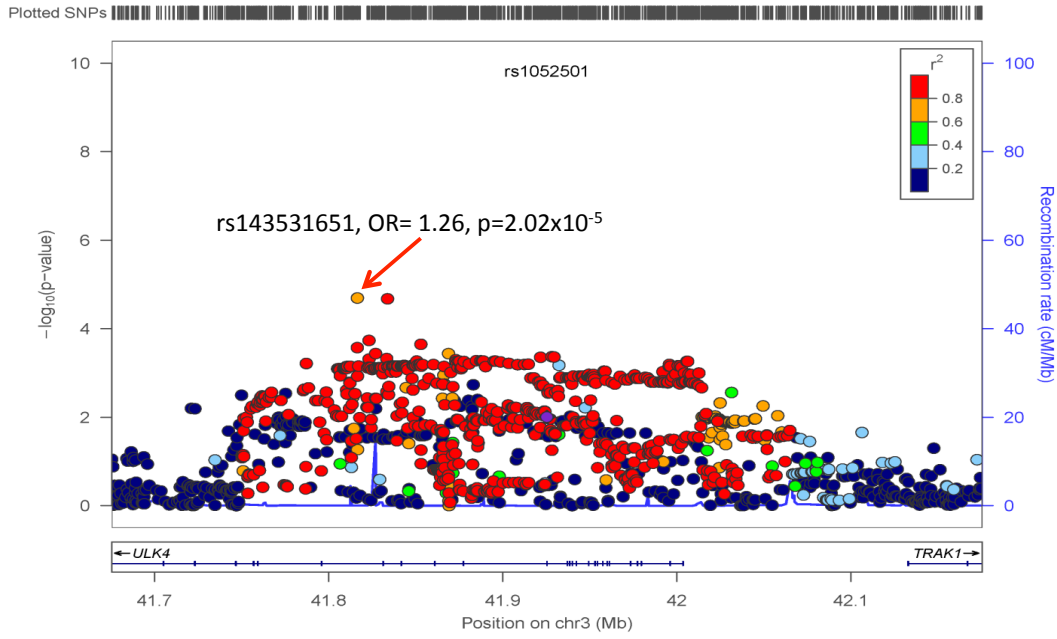

### 3q26.2

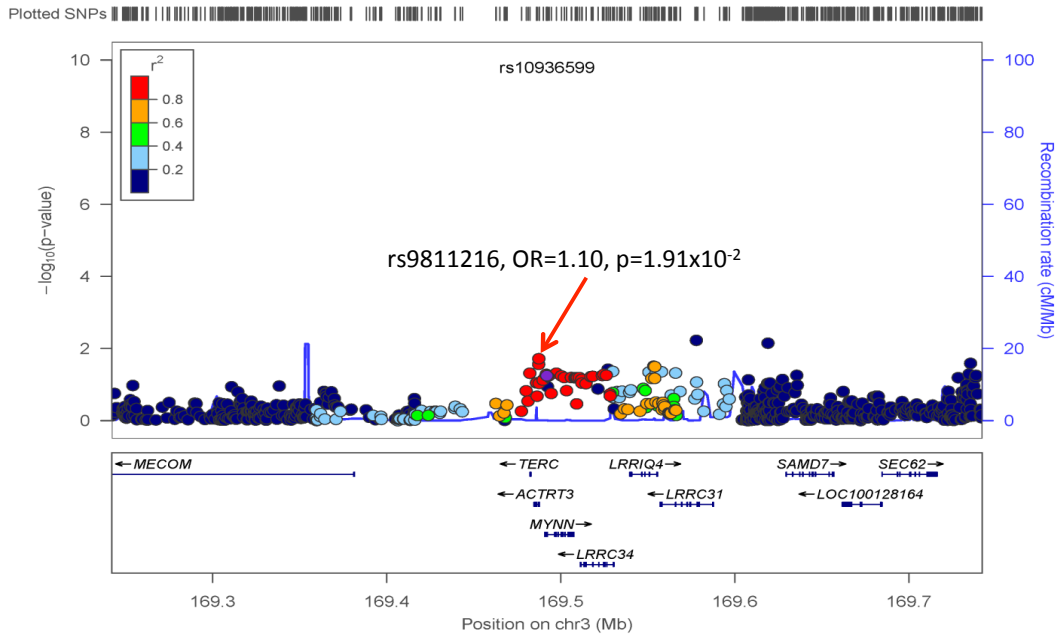

7p15.3

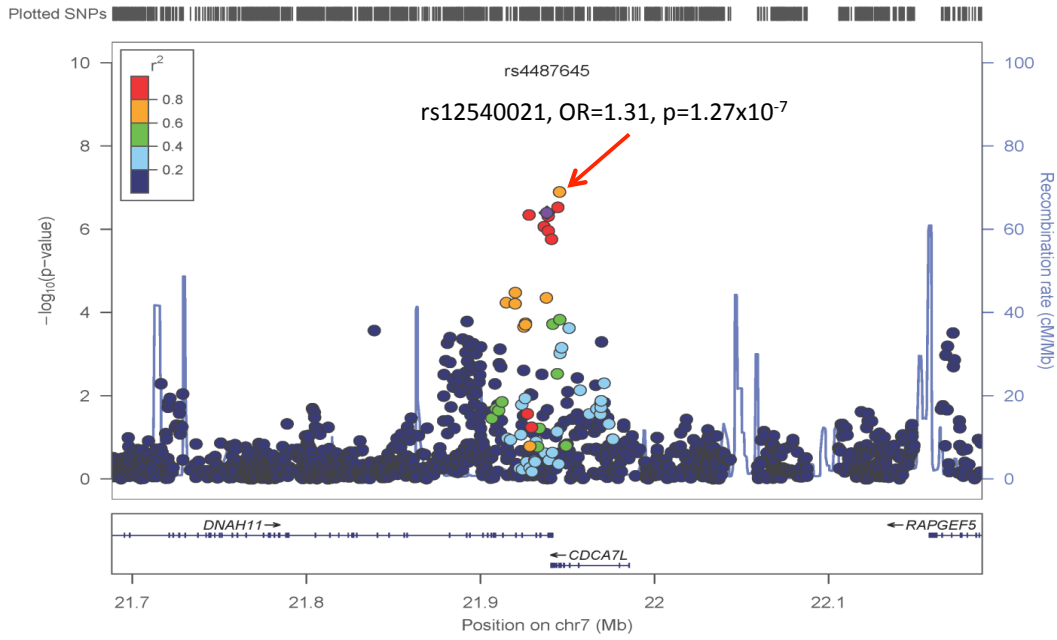

17p11.2

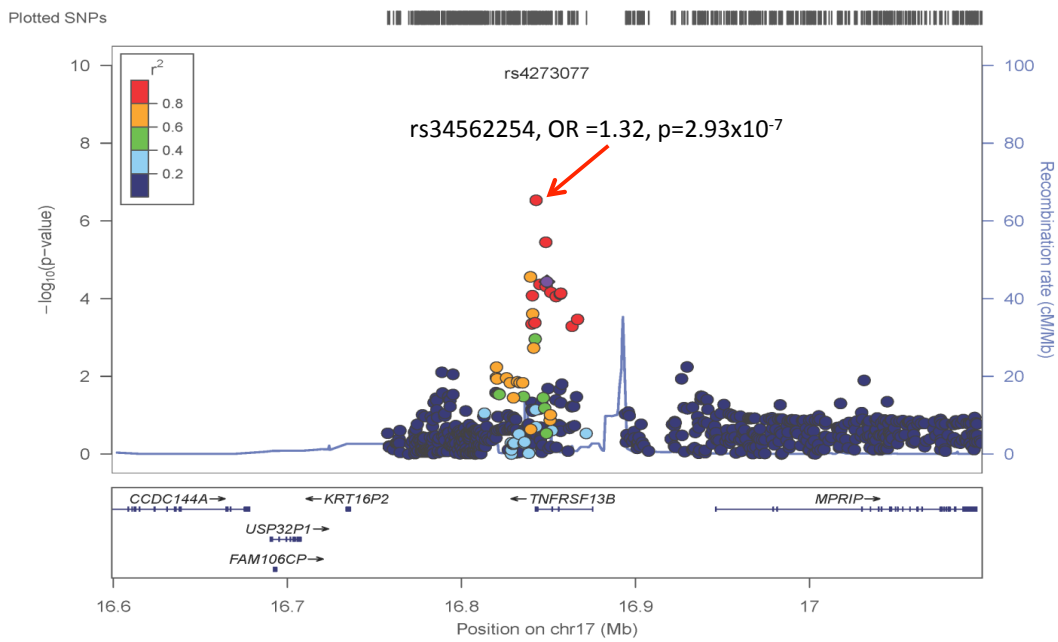

22q13.1

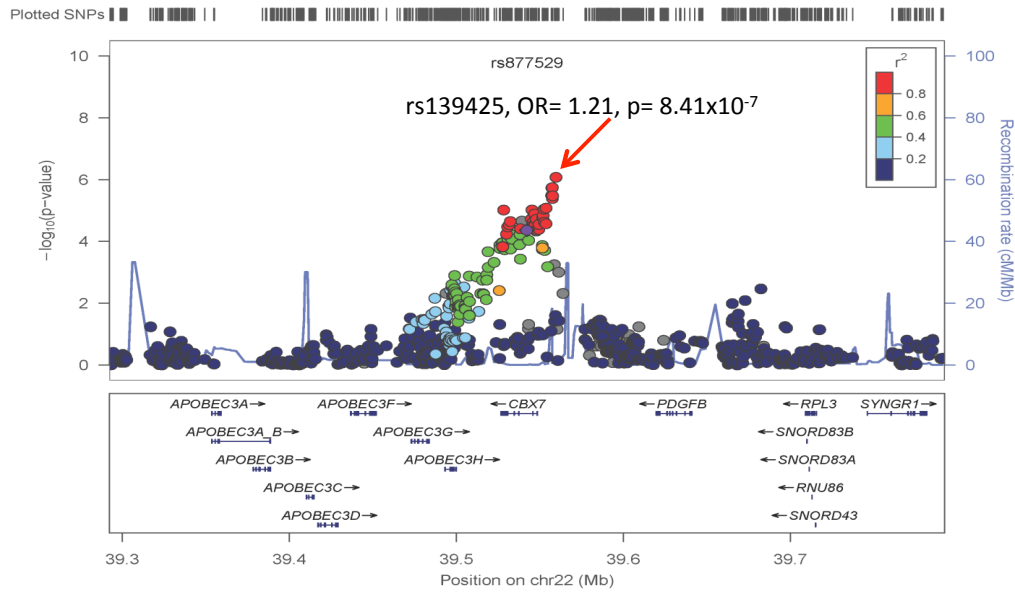

**Supplementary Figure 3b. LocusZoom Plots of European and African ancestry combined meta-analysis with LD calculated in relation to the index SNP (1KGP AFR ref). The most significant Group A SNP in each region is labeled**

**2p23.3**

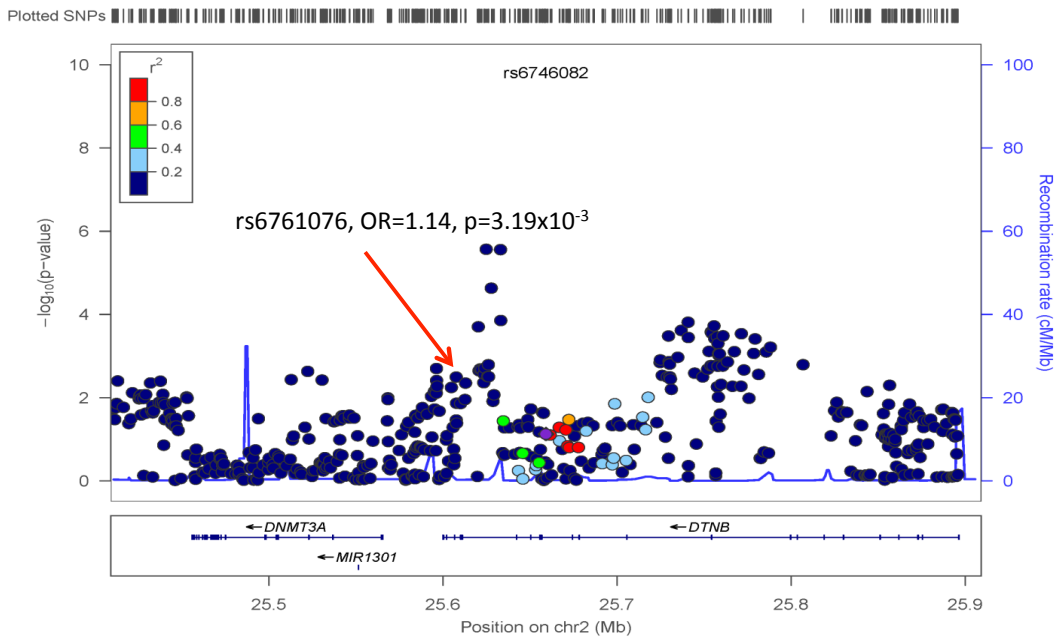

**2q12.3**

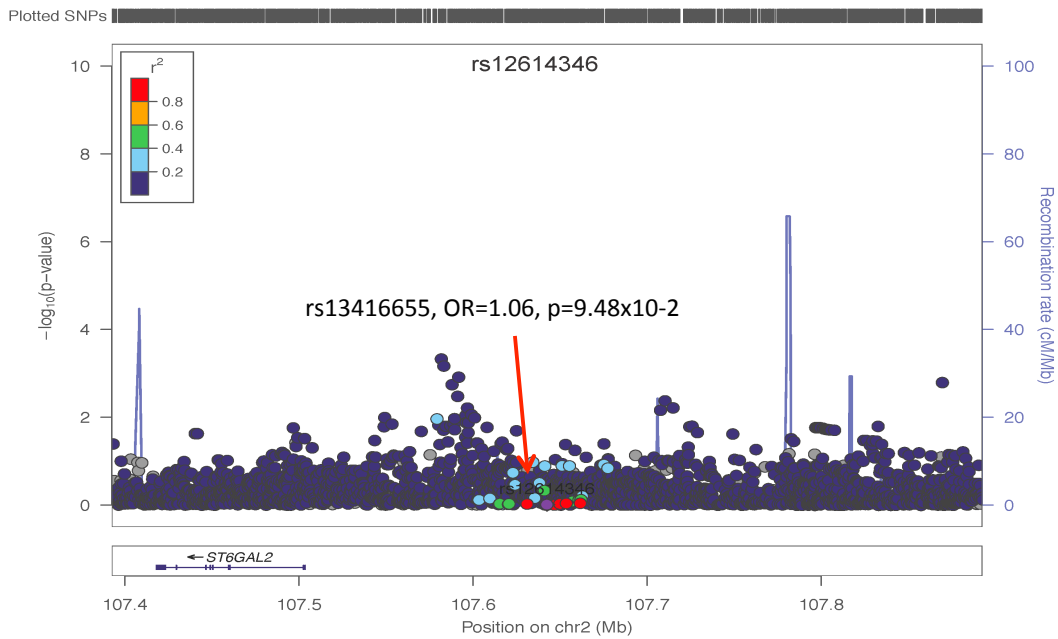

### 3p22.1

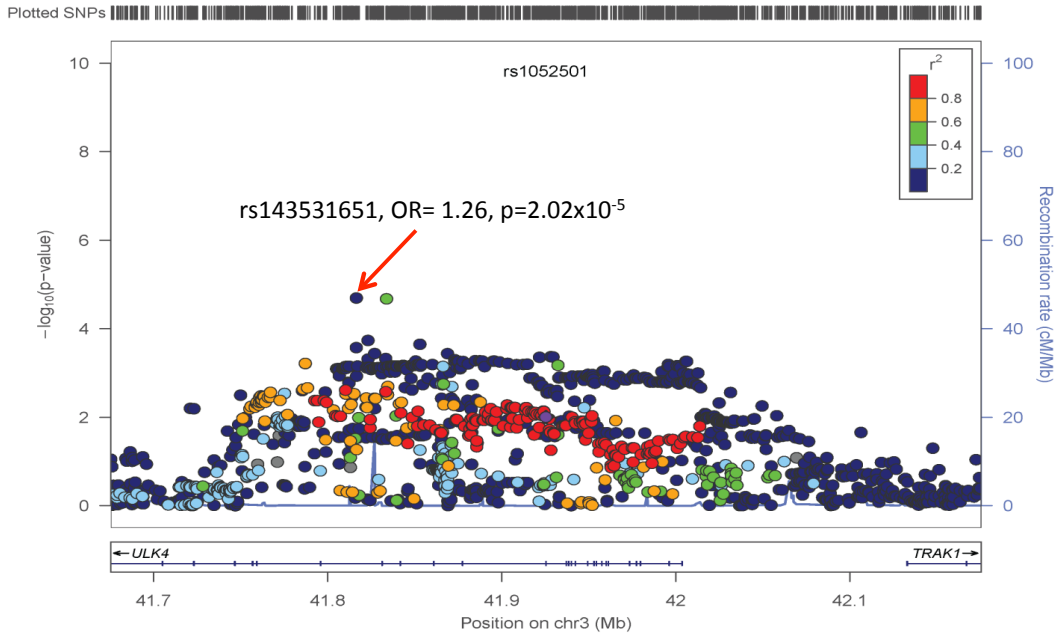

### 3q26.2

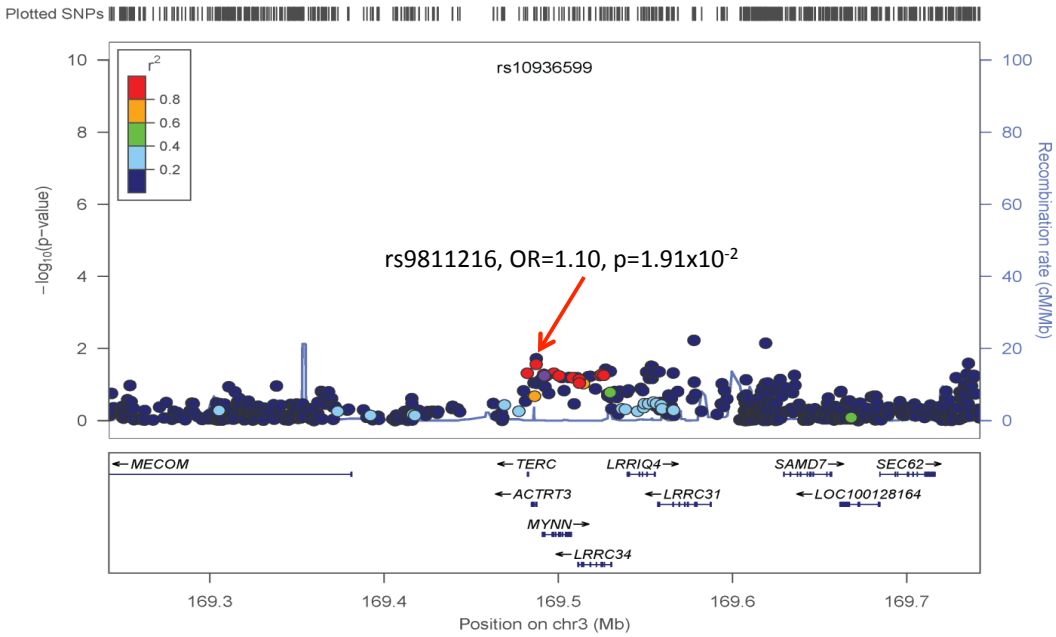



### 7p15.3

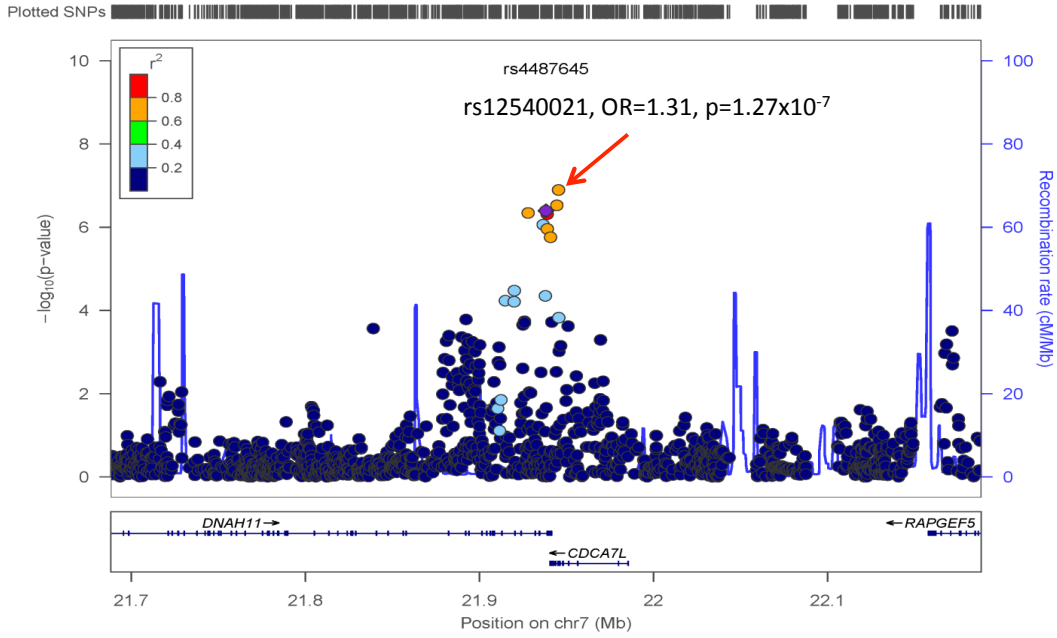

### 17p11.2

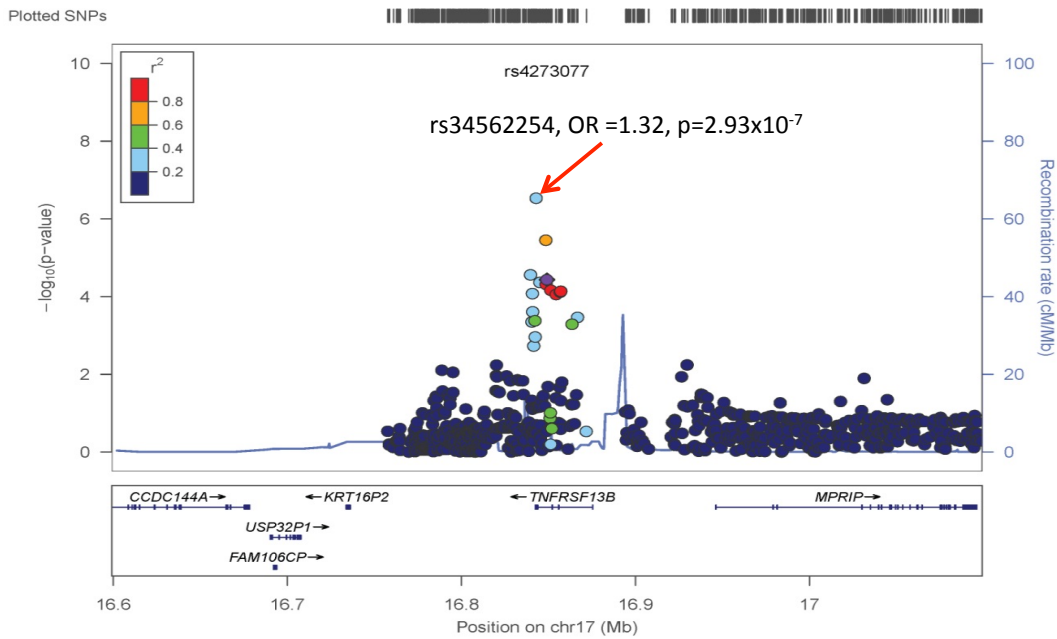

22q13.1

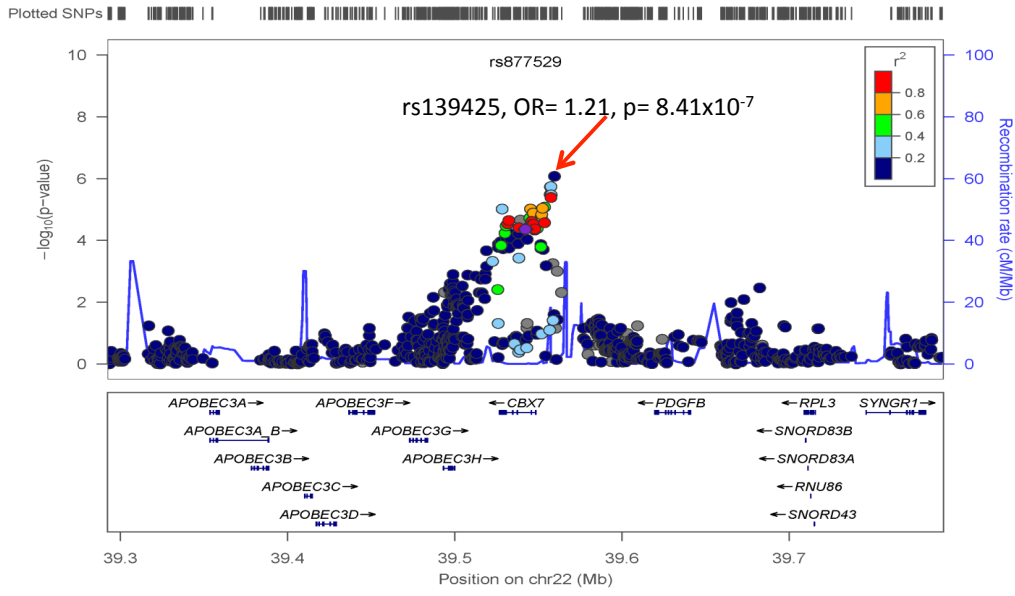

**Supplementary Table 1. Imputation quality by region in subjects of African ancestry.**

| <b>SNP</b> | <b>CHR:BP</b> | <b>Typed<sup>a</sup></b> | <b>Imputed<sup>b</sup></b> | <b>info &gt; 0.8<sup>c</sup></b> | <b>info &lt; 0.8<sup>d</sup></b> |
|------------|---------------|--------------------------|----------------------------|----------------------------------|----------------------------------|
| rs6746082  | 2:25659244    | 27                       | 2006                       | 884                              | 1122                             |
| rs12614346 | 2:107642482   | 42                       | 2971                       | 2396                             | 575                              |
| rs1052501  | 3:41925398    | 22                       | 3438                       | 2777                             | 661                              |
| rs10936599 | 3:169492101   | 34                       | 2910                       | 1492                             | 1418                             |
| rs2285803  | 6:31107258    | 125                      | 10229                      | 9358                             | 871                              |
| rs4487645  | 7:21938240    | 78                       | 4174                       | 2669                             | 1505                             |
| rs4273077  | 17:16849139   | 22                       | 2574                       | 1125                             | 1449                             |
| rs877529   | 22:39542292   | 34                       | 3967                       | 1322                             | 2645                             |

<sup>a</sup>Number of genotyped SNPs within +/- 250 kb of the index marker

<sup>b</sup>Number of KGP imputed SNPs with MAF>1%

<sup>c</sup>Imputed SNPs with info > 0.8 and MAF >1%

<sup>d</sup>Imputed SNPs with info < 0.8 and MAF >1%

**Supplementary Table 2. Significance thresholds for eight regions derived from 1,000 permutations using African ancestry case-control data.**

| SNP        | CHR:BP      | N SNPs <sup>a</sup>  |                      | Significance threshold |                       |
|------------|-------------|----------------------|----------------------|------------------------|-----------------------|
|            |             | Group A <sup>b</sup> | Group B <sup>c</sup> | Group A <sup>b</sup>   | Group B <sup>c</sup>  |
| rs6746082  | 2:25659244  | 14                   | 870                  | $7.60 \times 10^{-3}$  | $5.04 \times 10^{-6}$ |
| rs12614346 | 2:107642482 | 59                   | 2337                 | $4.85 \times 10^{-3}$  | $7.19 \times 10^{-6}$ |
| rs1052501  | 3:41925398  | 711                  | 2066                 | $1.48 \times 10^{-3}$  | $5.60 \times 10^{-6}$ |
| rs10936599 | 3:169492101 | 70                   | 1422                 | $2.41 \times 10^{-3}$  | $7.62 \times 10^{-6}$ |
| rs2285803  | 6:31107258  | 52                   | 9306                 | $5.46 \times 10^{-3}$  | $1.03 \times 10^{-6}$ |
| rs4487645  | 7:21938240  | 26                   | 2643                 | $4.44 \times 10^{-3}$  | $3.43 \times 10^{-6}$ |
| rs4273077  | 17:16849139 | 36                   | 1089                 | $3.93 \times 10^{-3}$  | $5.79 \times 10^{-6}$ |
| rs877529   | 22:39542292 | 58                   | 1264                 | $2.87 \times 10^{-3}$  | $2.50 \times 10^{-6}$ |

<sup>a</sup>Total number of SNPs (MAF>1% and INFO>0.80) within +/-250 kb of the index SNP

<sup>b</sup>SNP correlated with the index SNP at  $r^2 \geq 0.50$  (based on the 1000 Genomes EUR populations)

<sup>c</sup>SNP correlated with the index SNP at  $r^2 < 0.50$  (based on the 1000 Genomes EUR populations)

**Supplementary Table 3. The most significant associations in subjects of African ancestry ( $r^2 \geq 0.50$  with index in KGP EUR).**

| SNP         | CHR:BP      | A1 <sup>a</sup> /A2 | Freq in EAs <sup>b</sup> | Freq in AAs <sup>b</sup> | OR <sup>b</sup> AA | P-value AA            | r <sup>2</sup> with Index in Region <sup>c</sup> |
|-------------|-------------|---------------------|--------------------------|--------------------------|--------------------|-----------------------|--------------------------------------------------|
| rs679112    | 2:25718052  | A/G                 | 0.75                     | 0.58                     | 1.09               | $8.10 \times 10^{-2}$ | 0.25 / 0.53                                      |
| rs13416655  | 2:107621925 | C/T                 | 0.50                     | 0.39                     | 1.10               | $4.90 \times 10^{-2}$ | 0.13 / 0.52                                      |
| rs143531651 | 3:41816589  | G/C                 | 0.17                     | 0.11                     | 1.27               | $1.37 \times 10^{-3}$ | 0.02 / 0.79                                      |
| rs9833035   | 3:169553498 | G/T                 | 0.78                     | 0.69                     | 1.10               | $5.67 \times 10^{-2}$ | 0.13 / 0.61                                      |
| rs113704463 | 6:311113052 | G/A                 | 0.29                     | 0.40                     | 1.15               | $1.27 \times 10^{-3}$ | 0.38 / 0.57                                      |
| rs56249828  | 7:21944607  | T/C                 | 0.68                     | 0.89                     | 1.41               | $1.85 \times 10^{-5}$ | 0.71 / 0.85                                      |
| rs34562254  | 17:16842991 | A/G                 | 0.11                     | 0.13                     | 1.25               | $1.33 \times 10^{-3}$ | 0.33 / 0.90                                      |
| rs139425    | 22:39559742 | C/G                 | 0.46                     | 0.71                     | 1.21               | $5.45 \times 10^{-4}$ | 0.18 / 0.95                                      |

<sup>a</sup>Risk allele

<sup>b</sup>Frequency and OR for A1 allele

<sup>c</sup>r<sup>2</sup> metrics based on 1000 Genomes Project AFR/EUR populations

**Supplementary Table 4. The most significant associations in subjects of European ancestry ( $r^2 \geq 0.50$  with index in KGP EUR).**

| SNP         | CHR:BP      | A1 <sup>a</sup> /A2 | Freq in EAs <sup>b</sup> | Freq in AAs | OR EA | P-value EA            | P-het EA | R2 with Index in region <sup>c</sup> |
|-------------|-------------|---------------------|--------------------------|-------------|-------|-----------------------|----------|--------------------------------------|
| rs4665791   | 2:25698847  | G/A                 | 0.83                     | 0.57        | 1.24  | $3.99 \times 10^{-3}$ | 0.42     | 0.38 / 0.61                          |
| rs4676096   | 2:107603011 | A/G                 | 0.34                     | 0.19        | 1.06  | $3.18 \times 10^{-1}$ | 0.48     | 0.30 / 0.86                          |
| rs28581706  | 3:41871397  | C/A                 | 0.13                     | 0.35        | 1.41  | $2.23 \times 10^{-4}$ | 0.43     | 0.29 / 0.55                          |
| rs55735727  | 3:169488148 | A/T                 | 0.74                     | 0.89        | 1.16  | $3.49 \times 10^{-2}$ | 0.80     | 0.26 / 0.66                          |
| rs112941857 | 6:31129642  | A/C                 | 0.21                     | 0.13        | 1.27  | $2.56 \times 10^{-3}$ | 0.71     | 0.05 / 0.62                          |
| rs6948632   | 7:21929452  | G/T                 | 0.69                     | 0.60        | 1.24  | $4.00 \times 10^{-4}$ | 0.63     | 0.03 / 0.90                          |
| rs34562254  | 17:16842991 | A/G                 | 0.11                     | 0.13        | 1.45  | $2.39 \times 10^{-5}$ | 0.37     | 0.33 / 0.90                          |
| rs139413    | 22:39553772 | G/A                 | 0.49                     | 0.46        | 1.22  | $2.49 \times 10^{-4}$ | 0.72     | 0.92 / 0.99                          |

<sup>a</sup>Risk allele

<sup>b</sup>Minimum frequency observed in meta-analysis of four studies

<sup>c</sup> $r^2$  metrics based on 1000 Genomes Project AFR/EUR populations



Supplementary Table 6. Functional overlap for fine-mapping SNPs that were significantly associated with multiple myeloma risk in the combined African and European ancestry analysis.

| chromosome | start    | end      | name       | CD20_R001778 DNASE HYPERSENSITIVE SITE | CD20_R001794 CTCF SITE | CD20_R001794 ENHANCER REGION WITH ACTIVE MARKS | CD20_R001794 DNASE HYPERSENSITIVE SITE IN ENHANCER REGION WITH ACTIVE MARKS | CD20_R001794 PROMOTER REGION WITH ACTIVE MARKS | CD20_R001794 DNASE HYPERSENSITIVE SITE IN PROMOTER REGION WITH ACTIVE MARKS | CD20_R001794 DNASE HYPERSENSITIVE SITE | MISSENSE | 3' UTR | GENE      |
|------------|----------|----------|------------|----------------------------------------|------------------------|------------------------------------------------|-----------------------------------------------------------------------------|------------------------------------------------|-----------------------------------------------------------------------------|----------------------------------------|----------|--------|-----------|
| chr3       | 42003368 | 42003369 | rs73071261 | 0                                      | 0                      | 0                                              | 0                                                                           | 0                                              | 0                                                                           | 0                                      | 0        | 0      |           |
| chr3       | 42003697 | 42003698 | rs73830585 | 0                                      | 0                      | 0                                              | 0                                                                           | 0                                              | 0                                                                           | 0                                      | 0        | 0      |           |
| chr3       | 42002760 | 42002761 | rs55916855 | 0                                      | 0                      | 0                                              | 0                                                                           | 0                                              | 1                                                                           | 0                                      | 0        | 0      |           |
| chr3       | 42001846 | 42001847 | rs73071259 | 0                                      | 0                      | 1                                              | 0                                                                           | 0                                              | 0                                                                           | 0                                      | 0        | 0      |           |
| chr3       | 42004427 | 42004428 | rs55953604 | 0                                      | 0                      | 0                                              | 0                                                                           | 1                                              | 0                                                                           | 0                                      | 0        | 0      |           |
| chr3       | 41923008 | 41923009 | rs73081392 | 0                                      | 1                      | 0                                              | 0                                                                           | 0                                              | 0                                                                           | 0                                      | 0        | 0      |           |
| chr3       | 42005165 | 42005166 | rs60966614 | 0                                      | 0                      | 1                                              | 0                                                                           | 0                                              | 0                                                                           | 0                                      | 0        | 0      |           |
| chr3       | 42004680 | 42004681 | rs4434125  | 0                                      | 0                      | 1                                              | 0                                                                           | 0                                              | 0                                                                           | 0                                      | 0        | 0      |           |
| chr3       | 42004881 | 42004882 | rs56290987 | 0                                      | 0                      | 1                                              | 0                                                                           | 0                                              | 0                                                                           | 0                                      | 0        | 0      |           |
| chr3       | 41831202 | 41831203 | rs17215589 | 0                                      | 0                      | 0                                              | 0                                                                           | 0                                              | 0                                                                           | 0                                      | 1        | 0      | ULK4      |
| chr3       | 42004426 | 42004427 | rs56201224 | 0                                      | 0                      | 0                                              | 0                                                                           | 1                                              | 0                                                                           | 0                                      | 0        | 0      |           |
| chr3       | 41923299 | 41923300 | rs17217536 | 0                                      | 1                      | 0                                              | 0                                                                           | 0                                              | 0                                                                           | 0                                      | 0        | 0      |           |
| chr3       | 42001986 | 42001987 | rs7639859  | 0                                      | 0                      | 1                                              | 0                                                                           | 0                                              | 0                                                                           | 0                                      | 0        | 0      |           |
| chr3       | 41952851 | 41952852 | rs35263917 | 0                                      | 0                      | 0                                              | 0                                                                           | 0                                              | 0                                                                           | 0                                      | 1        | 0      | ULK4      |
| chr7       | 21939031 | 21939032 | rs56333627 | 0                                      | 0                      | 1                                              | 0                                                                           | 0                                              | 0                                                                           | 0                                      | 0        | 0      |           |
| chr7       | 21936697 | 21936698 | rs75341503 | 0                                      | 0                      | 1                                              | 0                                                                           | 0                                              | 0                                                                           | 0                                      | 0        | 0      |           |
| chr7       | 21928078 | 21928079 | rs57104699 | 0                                      | 0                      | 1                                              | 0                                                                           | 0                                              | 0                                                                           | 0                                      | 0        | 0      |           |
| chr7       | 21944606 | 21944607 | rs56249828 | 0                                      | 0                      | 1                                              | 0                                                                           | 0                                              | 0                                                                           | 0                                      | 0        | 0      |           |
| chr7       | 21938239 | 21938240 | rs4487645  | 0                                      | 0                      | 0                                              | 1                                                                           | 0                                              | 0                                                                           | 0                                      | 0        | 0      |           |
| chr7       | 21939088 | 21939089 | rs55714084 | 0                                      | 0                      | 1                                              | 0                                                                           | 0                                              | 0                                                                           | 0                                      | 0        | 0      |           |
| chr7       | 21940959 | 21940960 | rs7971     | 0                                      | 0                      | 1                                              | 0                                                                           | 0                                              | 0                                                                           | 0                                      | 0        | 1      |           |
| chr7       | 21945562 | 21945563 | rs12540021 | 0                                      | 0                      | 1                                              | 0                                                                           | 0                                              | 0                                                                           | 0                                      | 0        | 0      |           |
| chr17      | 16848564 | 16848565 | rs4500785  | 0                                      | 0                      | 1                                              | 0                                                                           | 0                                              | 0                                                                           | 0                                      | 0        | 0      |           |
| chr17      | 16842990 | 16842991 | rs34562254 | 0                                      | 0                      | 0                                              | 0                                                                           | 0                                              | 0                                                                           | 0                                      | 1        | 0      | TNFRSF13B |
| chr22      | 39547961 | 39547962 | rs6001455  | 0                                      | 0                      | 0                                              | 0                                                                           | 0                                              | 1                                                                           | 0                                      | 0        | 0      |           |
| chr22      | 39530131 | 39530132 | rs139385   | 0                                      | 0                      | 0                                              | 0                                                                           | 0                                              | 0                                                                           | 1                                      | 0        | 0      |           |
| chr22      | 39547020 | 39547021 | rs139403   | 0                                      | 0                      | 1                                              | 0                                                                           | 0                                              | 0                                                                           | 0                                      | 0        | 0      |           |
| chr22      | 39549425 | 39549426 | rs12158877 | 0                                      | 0                      | 0                                              | 0                                                                           | 0                                              | 1                                                                           | 0                                      | 0        | 0      |           |
| chr22      | 39530858 | 39530859 | rs139386   | 0                                      | 1                      | 0                                              | 0                                                                           | 0                                              | 0                                                                           | 0                                      | 0        | 0      |           |
| chr22      | 39547200 | 39547201 | rs139404   | 0                                      | 0                      | 1                                              | 0                                                                           | 0                                              | 0                                                                           | 0                                      | 0        | 0      |           |
| chr22      | 39549525 | 39549526 | rs139405   | 0                                      | 0                      | 0                                              | 0                                                                           | 0                                              | 1                                                                           | 0                                      | 0        | 0      |           |
| chr22      | 39547890 | 39547891 | rs1005300  | 0                                      | 0                      | 0                                              | 0                                                                           | 0                                              | 1                                                                           | 0                                      | 0        | 0      |           |
| chr22      | 39546144 | 39546145 | rs139402   | 0                                      | 0                      | 1                                              | 0                                                                           | 0                                              | 0                                                                           | 0                                      | 0        | 0      |           |
| chr22      | 39545395 | 39545396 | rs139400   | 0                                      | 0                      | 1                                              | 0                                                                           | 0                                              | 0                                                                           | 0                                      | 0        | 0      |           |
| chr22      | 39544969 | 39544970 | rs139398   | 1                                      | 0                      | 0                                              | 1                                                                           | 0                                              | 0                                                                           | 0                                      | 0        | 0      |           |
| chr22      | 39539298 | 39539299 | rs71813239 | 0                                      | 0                      | 1                                              | 0                                                                           | 0                                              | 0                                                                           | 0                                      | 0        | 0      |           |
| chr22      | 39542291 | 39542292 | rs877529   | 0                                      | 0                      | 0                                              | 1                                                                           | 0                                              | 0                                                                           | 0                                      | 0        | 0      |           |
| chr22      | 39548026 | 39548027 | rs5995688  | 0                                      | 0                      | 0                                              | 0                                                                           | 0                                              | 1                                                                           | 0                                      | 0        | 0      |           |
| chr22      | 39546073 | 39546074 | rs139401   | 0                                      | 0                      | 1                                              | 0                                                                           | 0                                              | 0                                                                           | 0                                      | 0        | 0      |           |
| chr22      | 39528439 | 39528440 | rs79503    | 0                                      | 0                      | 0                                              | 0                                                                           | 0                                              | 0                                                                           | 1                                      | 0        | 1      |           |
| TOTAL      |          |          |            | 1                                      | 3                      | 19                                             | 3                                                                           | 2                                              | 8                                                                           | 2                                      | 3        | 2      |           |
